# Supplementary material for: Subversion of Serotonin Receptor Signaling in Osteoblasts by Kynurenine Drives Acute Myeloid Leukemia
Source: Oxford University Press journal article supplement (doi:10.1158/2159-8290.cd-21-0692), 2022-01-19
Supplement: cd-21-0692_supplementary_table_s2_supps2.xlsx [file cd-21-0692_supplementary_table_s2_supps2.xlsx]

## Sheet: sgRNA#146
Off-target sites for mouse sgRNA 146 (PAM in red): CGCCAUGGUGAUGUACCCCA GGG
Mismatch with guide sequence is denoted in blue
Off target sites located in non-coding regions are indicated by an empty box in the Gene column
Off target site	mismatches	Chromosome	Cute site	PAM	Gene
AGCCATGATGATGCACCACA	4	chr10	60341410	AGG	Cdh23
CCCCATGGTGATGGACAGCA	4	chr13	50226577	TGG
CCCCATGGTGATGGACAGCA	4	chr13	50283597	TGG
CCCCATGGTGATGGACAGCA	4	chr13	50579019	TGG
CCCCAAGGTGATGTTCACCA	4	chr10	128886474	AGG	Gdf11
CGCCATGATTATGTCCCTCA	4	chr10	46234609	TGG	RP23-373D18.1
CACCATGGAGATCAACCCCA	4	chr12	110661535	AGG	Dync1h1
CACCATGGTGATGTACACAG	4	chr6	34038251	TGG	Lrguk
CCCCATGGTGATGGATGCCA	4	chr14	21020749	AGG	Vcl
AGCCATGGTGAGGTCCCCGA	4	chr11	100431148	TGG	Nt5c3b
GGCCATGTGGATGAACCCCA	4	chr17	86161420	TGG
TGCCATGGGGATGCATCCCA	4	chr17	86551588	TGG	Prkce
CCCCATGGTTATCTACCCAA	4	chr6	139151594	AGG
CGCCTTGCTGATGGTCCCCA	4	chr7	4929271	CGG	Ssc5d
CCCCACGGTGATGAGCCCCA	4	chr7	6709157	TGG	Peg3
CACCATGGTGGTGTTCTCCA	4	chr1	123785091	AGG	Dpp10
CTCCATGGTGAAGAGCCCCA	4	chr3	57478764	TGG	Wwtr1
CTCCATTGAGATGTATCCCA	4	chr17	27340794	GGG
CTCCAAGGTGATGTCACCCA	4	chr6	120926177	GGG
CTCCATGATGCTGTCCCCCA	4	chr9	42203508	AGG	RP24-395P13.2

## Sheet: sgRNA#196
Off-target sites for mouse sgRNA 196 (PAM in red): CUGCCCACACUGAGCACGGA CGG
Mismatch with guide sequence is denoted in blue
Off target sites located in non-coding regions are indicated by an empty box in the Gene column
Off target site	mismatches	Chromosome	Cute site	PAM	Gene
ATGCGCACACTGAGCAGGGA	3	chr18	53410283	AGG	Ppic
CTGTCGACACTGAGCAAGGA	3	chr9	56600994	TGG
CTGCCCACACTGACAACCGA	3	chr17	8903091	AGG	Pde10a
CTGCACACTCTGAGAACGGA	3	chr11	88200044	AGG
ATGCCCACACTGACCACGGC	3	chr15	8702734	AGG	Slc1a3
GAGACCACACTGAGCACGGA	3	chr13	55670662	CGG	Ddx46
CTGCCAACACTGAGTACGGT	3	chr7	46358129	TGG
CAGCCCACACTGAGCCAGGA	3	chr10	59908135	GGG
CTCCCCACACTGAGTACTGA	3	chr9	99580416	GGG	Dbr1
CTGCCCACCCAGAGCACAGA	3	chr4	79291332	TGG
CTGCACACTCTGAGAACGGA	3	KB469739.1	205468	AGG
CTGCCCACACACAGCAGGGA	3	chr4	58987190	AGG
CTGCCCACCTTGAACACAGA	4	KQ030494.1	412699	AGG
CTTCCCACACTGAAGAGGGA	4	chr16	10864916	GGG	Rmi2
CTGCACATACTGAGCATGTA	4	chr17	45331462	AGG
CTGCCCCCACAGGGCATGGA	4	chr6	107900958	TGG
CTGACCACACTCAGGATGGA	4	chr6	116653512	AGG	Rassf4
GTGGCCACACTGTGCACAGA	4	chr2	78597530	AGG

## Sheet: sgRNA#203
Off-target sites for mouse sgRNA 203 (PAM in red): CAGUCCGUCCGUGCUCAGUG TGG
Mismatch with guide sequence is denoted in blue
Off target sites located in non-coding regions are indicated by an empty box in the Gene column
Off target site	mismatches	Chromosome	Cute site	PAM	Gene
CAGTCCTTCCTTTCTCAGTG	3	chr13	93024734	AGG
AAGTCCGTGTGTGCTCAGTG	3	chr16	92658948	CGG	Runx1
CGCCCCGTCCGTGCTCAGTG	3	chr13	55670655	TGG	Ddx46
CAGTCCGTCAGAGCTCTGTG	3	chr1	69447470	TGG
CAGTCCGTCCATCCACAGGG	4	chr5	111839858	TGG
CAGTCCCACAGTGCACAGTG	4	chr7	19965411	TGG
CTGTCAGTCCTTGATCAGTG	4	chrX	67871707	TGG
CAGTCTTTCCTTGCTCAGAG	4	chr4	155513186	TGG	Gnb1
GAGTCCGTCCGTGATCACAG	4	chr8	117341474	TGG	Cmip
CATGCAGTCCGTGCTCAGTA	4	chr17	29776863	AGG
AAGCCCATCTGTGCTCAGTG	4	chr17	51966262	AGG
CACTCCGTCCTTTGTCAGTG	4	chr13	113684953	TGG
CAGTCAGTCCCTGGACAGTG	4	chr5	36203728	GGG	Sorcs2
CAGTCAGTCTCTGGTCAGTG	4	chr12	86777361	GGG
CAGTGCGTCTCAGCTCAGTG	4	chr11	96300894	CGG	Hoxb6
CCGTCCGTCCCAGCTCAGCG	4	chr1	136365041	GGG
CATTCCTTCTGTGCTCAGTT	4	chrX	48841373	TGG
CAGTCAGTCCCAGCCCAGTG	4	chr16	5821183	TGG
CAGTCCCTCGGCCCTCAGTG	4	chr13	8995828	CGG	Gtpbp4

## Sheet: sgRNA#610
Off-target sites for mouse sgRNA 610 (PAM in red): UAGGGAACAGCAAUAUUGCG GGG
Mismatches with guide sequence is denoted in blue
Off target sites located in non-coding regions are indicated by an empty box in the Gene column
Off target site	Mismatches	Chromosomes	Cut site	PAM	Gene
TAGGGATCAGCACTATTGGG	3	chr3	86365291	AGG	Lrba
TAGGGAACAGCAATATTATA	3	chr7	71213776	AGG
TAGTGAACAGCAATTTTGTG	3	chr2	76604029	GGG
TAGGGAACAGCACTATTAGG	3	chr6	4819803	AGG
TAGGAAACAGTAATATTGCT	3	chr8	110392094	GGG	Hydin
TAGAGAACATCAGTATTGCG	3	chr4	83939713	TGG
TAGGGAACAGCACTATTAGG	3	chr15	75875839	AGG
TAGGGAACAGGAATCTTGGG	3	chr7	63666183	AGG	Otud7a
TAGGGAATAGCACTATTGGG	3	chr8	101517216	GGG
CAGGGAACAGCACTATTGCA	3	chr1	6277631	AGG
TAGGGAACGGCACTATTGGG	3	chr5	10798113	AGG
TAAGGAAAAGCAATATTGAG	3	chr15	92388776	GGG
TAGGGAGCGGCACTATTGGG	4	chr14	120132592	AGG
TAGGGAACGGCACTATTAGG	4	chr10	38883142	AGG
TGGGGAACAGCACTATTAAG	4	chr11	106508914	AGG	Tex2
TAGGGAATAGCACTATTAGG	4	chr11	118822144	AGG	Rbfox3
TAGGGAGTAGCACTATTGGG	4	chr18	56714513	AGG	Lmnb1
CAGGGAGCAGCACTATTGGG	4	chr18	66386447	AGG
TAGGGAATAGCACTATTAAG	4	chr5	98747763	AGG	1700007G11Rik
TAGGGAATGGCAGTATTGAG	4	chr3	100784019	AGG

## Sheet: sgRNA#126
Off-target sites for human sgRNA 126: GUGCAAGGCGCUGUGACUUG TGG
Mismatches with guide sequence is denoted in blue
Off target sites located in non-coding regions are indicated by an empty box in the Gene column
Off target site	Mismatches	Chromosomes	Cut site	PAM	Gene
GTGCCAGGCTCTGTGACCTG	3	chr22	34451537	AGG
GTGGAAGGCGCTGTGGGTTG	3	chr12	98644930	AGG	IKBIP
GTGCCTGGCTCTGTGACTTG	3	chr12	105025833	AGG	C12orf45
GTGGAAGGCACAGTGACTTG	3	chr20	36811135	AGG	SOGA1
GTGCTAGGGGCTGTGACTCG	3	chr16	88840725	AGG	GALNS
TGGCAAGGCGCTGTGACTTC	3	chr2	90110362	TGG
TTGCATGGCGCTGAGACTTG	3	chr2	183266542	GGG
GGGCAAGTCGCTGTTACTTG	3	chr8	43170985	GGG	HGSNAT
GTGCCAGGCTCTGTGACGTG	3	chr10	5553107	TGG
GTGCAGGCCGCTGTGGCTTG	3	chr8	144149383	TGG	MROH1
GAGGAAGGCGCTGTGACTGG	3	chr8	144699816	GGG
GTGCCAAGTGCTGTGACCTG	4	chr12	106753537	AGG	RFX4
ATGCCAGGCGCTGTGAATTA	4	chr4	73594564	GGG	RASSF6
GTGCAGGGAGCAGTGGCTTG	4	chr3	187287424	TGG	MASP1
GTGTCAGGCTCTGTGACTTT	4	chr11	6748716	AGG	GVINP2
GTGCAAGGCGCTGGGGGTAG	4	chr11	15120280	AGG	INSC
GAGCAAGCTGCTGAGACTTG	4	chr21	38693857	GGG
GTGGAAAGCACTGGGACTTG	4	chr2	70733887	GGG	ADD2
GTGCCAGGCACTGTGCCTGG	4	chr2	205055086	GGG	PARD3B
GTGCAAGGTGCTGGGACTAT	4	chr5	169247739	AGG	SLIT3

## Sheet: sgRNA#170
Off-target sites for human sgRNA 170: UUUGCCCCACACAUAUGCCA UGG
Mismatches with guide sequence is denoted in blue
Off target sites located in non-coding regions are indicated by an empty box in the Gene column
Off target site	Mismatches	Chromosomes	Cut site	PAM	Gene
TTTACCCCACGCATATGCCT	3	chr15	85983712	GGG
TCTGCCCCACACACATCCCA	3	chr16	88983219	GGG
TTTGCCACACAGATATGCCT	3	chr9	28802748	TGG
TTTCCGCCACACAGATGCCA	3	chr3	11919420	GGG
TTTTGCCCCCACATATGCCA	3	chr8	87559743	TGG	CNBD1
TTTGCCACCCACATATACCA	3	chr11	105995944	TGG	MSANTD4
ATTGTCCCACACATAAGCCA	3	chr15	59335564	GGG	MYO1E
CTTCCCCCACTCATATGCCA	3	chr5	10110115	AGG
TTTGACACACACAGATGCCA	3	chr2	18093369	GGG	KCNS3
TTTGCACTACACACATGCCA	3	chr4	40501549	AGG	RBM47
GTTGCCCCACACCAATGCTA	4	chr19	32911796	TGG	CEP89
TTTCCTCCATACATATACCA	4	chr20	30212299	AGG
TTTTCCACACACATGTACCA	4	chr2	176551116	AGG
TTTTCCCCACAAATATCCCT	4	chr2	177855724	GGG	PDE11A
ATTGCCCCACAGATGTCCCA	4	chr15	91873370	GGG	SLCO3A1
TTTGCCCCACAGAGATGCTT	4	chr16	76534118	GGG	CNTNAP4
TTTGACCCACCCACATGTCA	4	chr16	82991612	AGG	CDH13
CTGGCCCCAGACATATGACA	4	chr13	72535569	TGG
TTTGCCACAGTCATAGGCCA	4	chr17	76617286	TGG
TTTCCCCCACCCATATCCTA	4	chr15	26595407	GGG	GABRB3
